# Supplementary material
Source: PubMed Central journal article supplement (PMC3790236)
Supplement: cr2013120x3.pdf [file cr2013120x3.pdf]

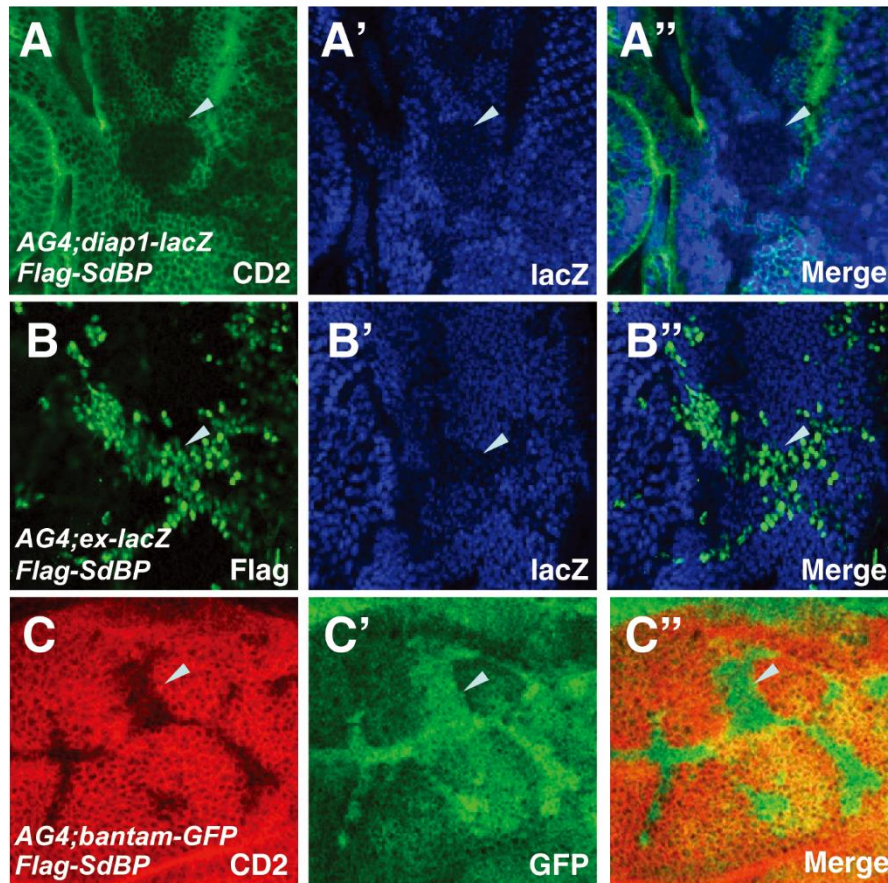

**Supplementary information, Figure S3** SdBP downregulated the transcription of the Hippo pathway target genes.

(A-C'') The transcription levels of the Hpo pathway target genes were downregulated in eye discs expressing SdBP under the control of *AG4: diap1-lacZ* (A-A''), *ex-lacZ* (B-B''), *bantam-GFP* (C-C''). Clone cells expressing SdBP were labeled with CD2 and lacZ (A-A''), Flag and lacZ (B-B''), CD2 and GFP (C-C''). Arrowheads indicated the clone regions.
