# Supplementary material
Source: PubMed Central journal article supplement (PMC3790236)
Supplement: cr2013120x6.pdf [file cr2013120x6.pdf]

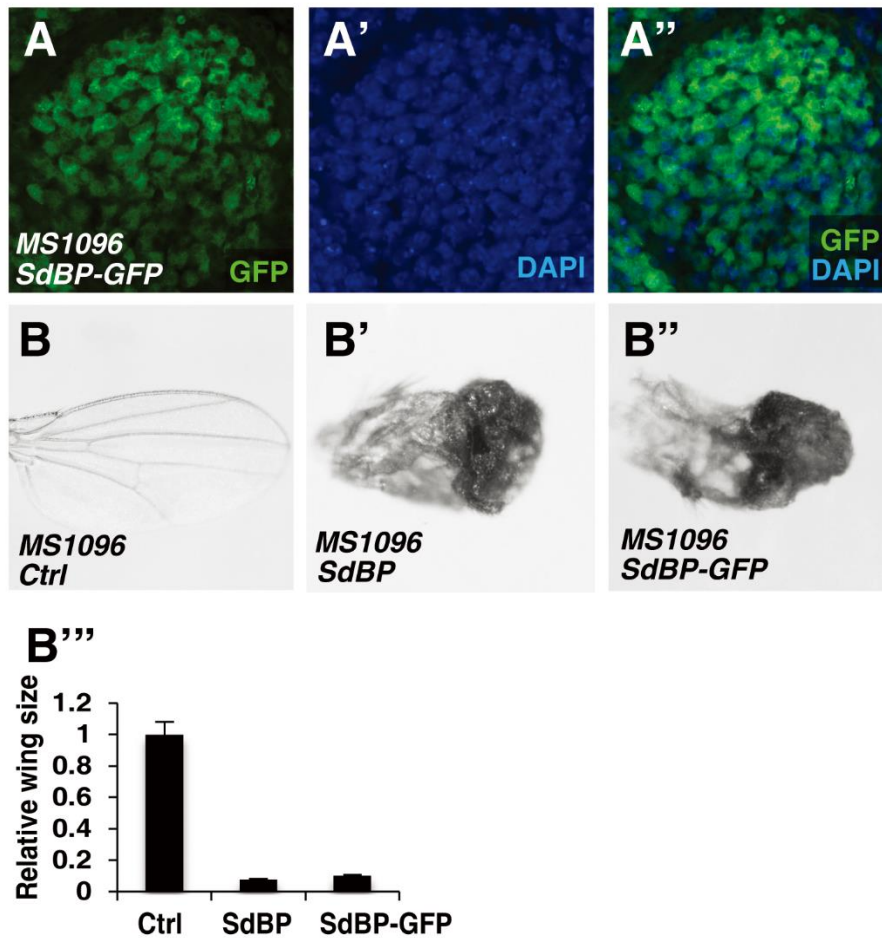

**Supplementary information, Figure S6** SdBp-GFP showed similar phenotype as SdBp.

(A-A'') Confocal images of third-instar wing discs expressing SdBp-GFP by *MS1096* driver.

GFP was in green and nuclei are stained with DAPI. (B-B'') Control adult wings (B) and adult

wings expressing wild type SdBp (B') and SdBp-GFP (B'') by *MS1096* driver. Quantification

of relative wing sizes of samples (fold change) indicated in B-B'' (B''').
